# Supplementary material
Source: publisher figshare collection journal article supplement (https://sage.figshare.com/ndownloader/files/18743465)
Supplement: Supplementary file 1 [file 18743465]

Supplementary figure 1. Circadian period in human fibroblast samples from RP patients with *PRPF31* mutations

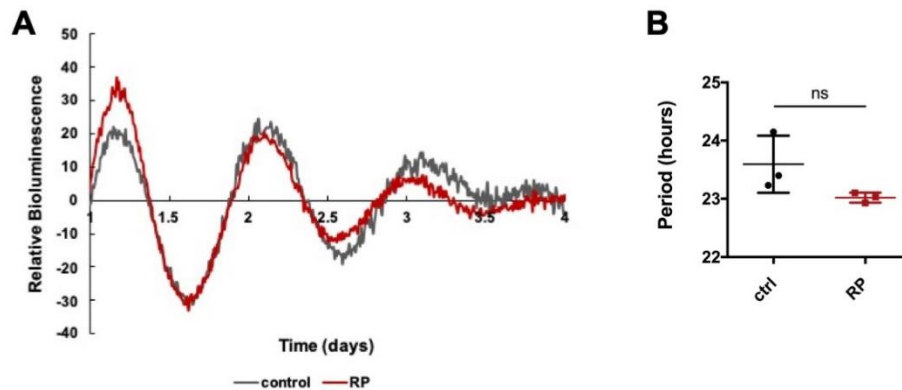

Supplementary figure 1. Circadian period in human fibroblast samples from RP patients with *PRPF31* mutations

Summary of period length of *Bmal1::luciferase* oscillations from the primary fibroblasts of *PRPF31* mutant (RP) and unaffected (ctrl) patients. Relative bioluminescence signal (baseline subtracted) is plotted over days 2-5 (first day after dexamethasone treatment was excluded). No significant difference was observed in the period length between the RP and ctrl samples. n.s., not significant at the 0.05 level as determined by Student's t-test, n=3. Each sample is an average of 3-4 independent lentiviral transfections, which were done in triplicate. Error bars = +/- SEM.
